# Supplementary material
Source: PubMed Central journal article supplement (PMC4426481)

**Figure 5A**

Che-1

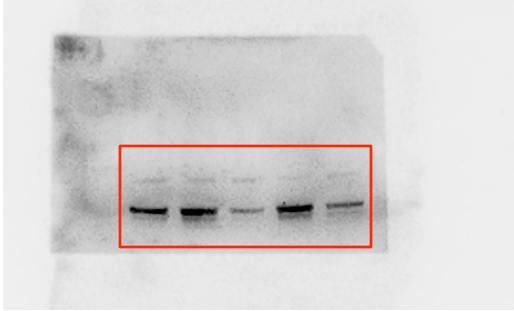

LC3 5 $\mu$ g

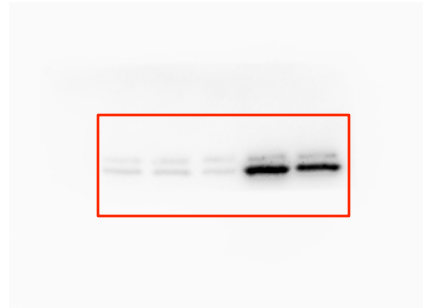

LC3 20 $\mu$ g

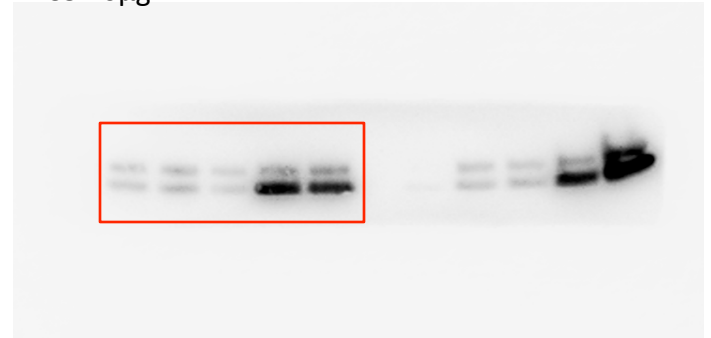

$\beta$ -actin

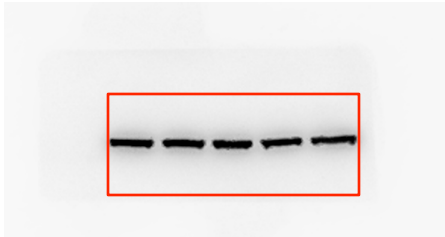

Figure 5B

Che-1

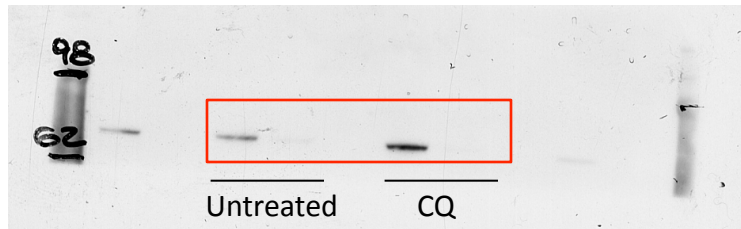

LC3

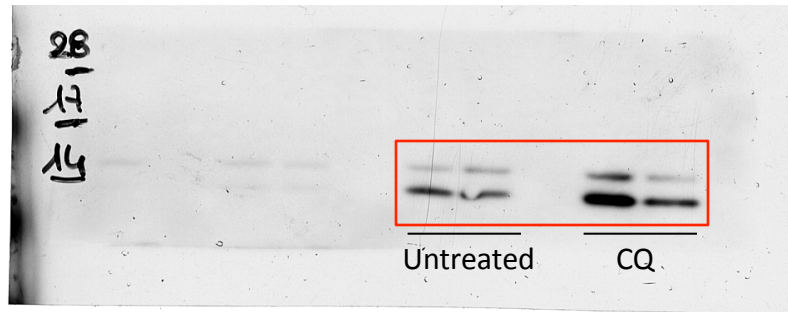

$\beta$ -actin

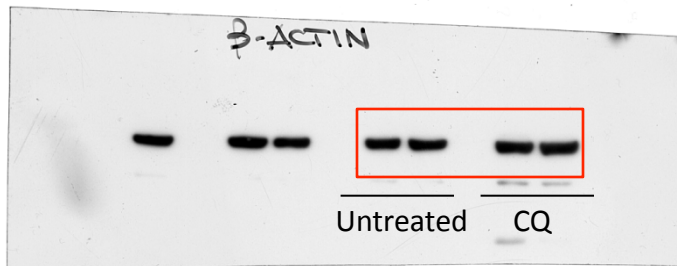

**Figure 5C**

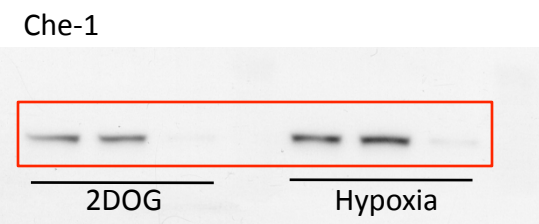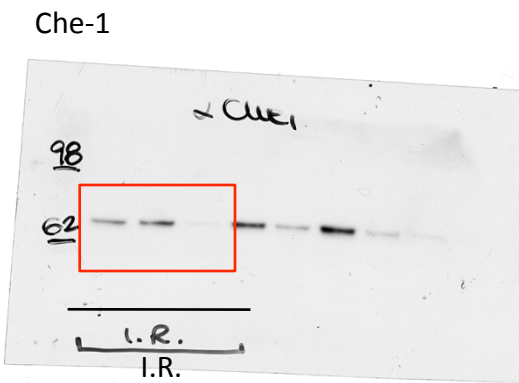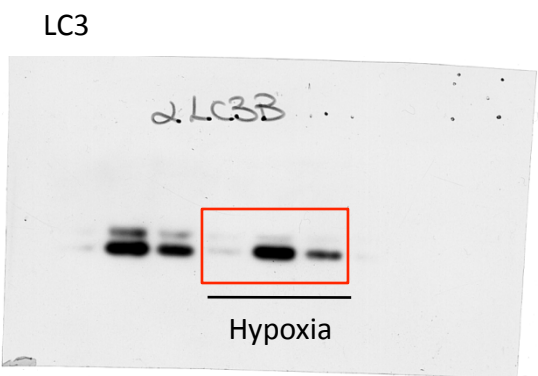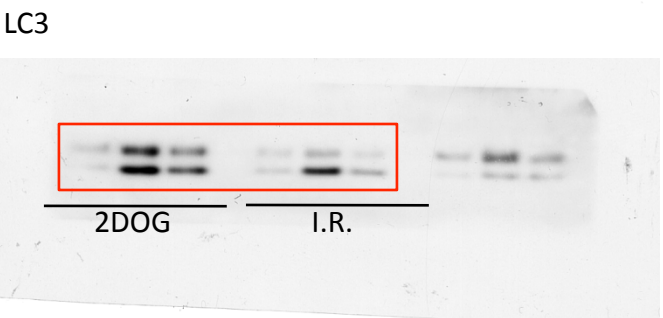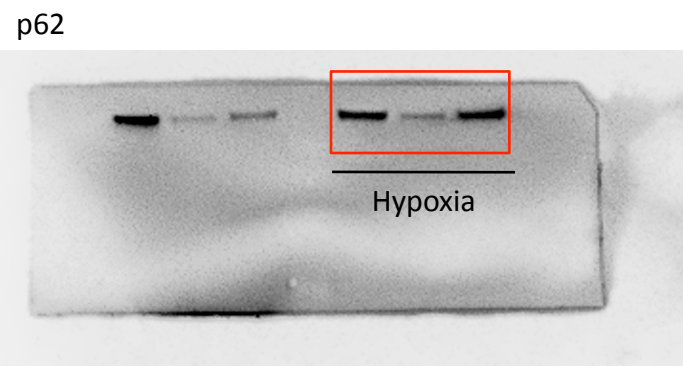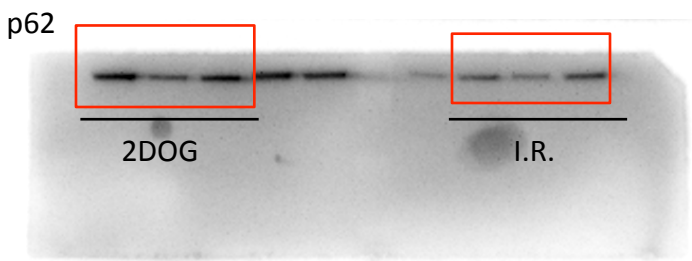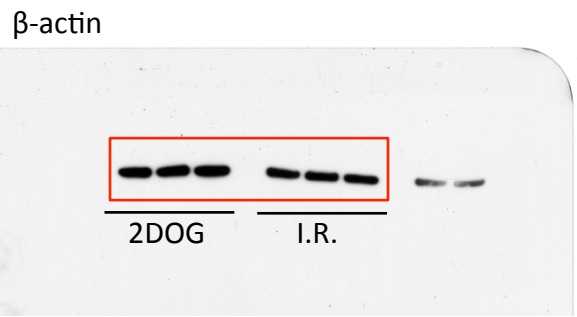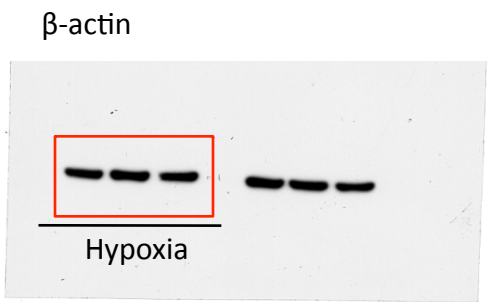

**Figure 5G**

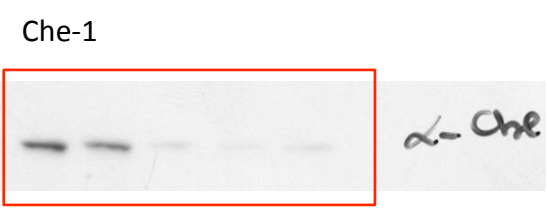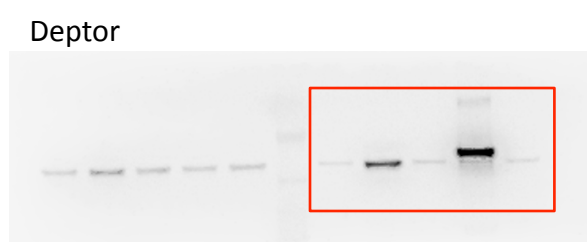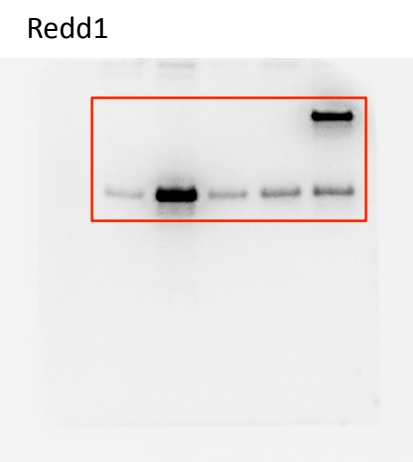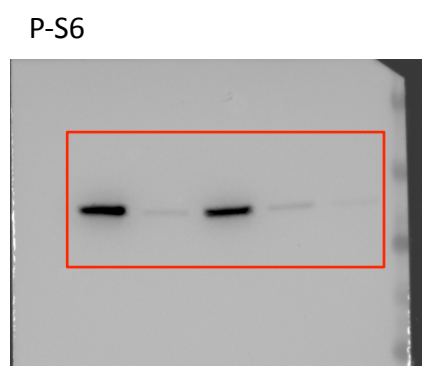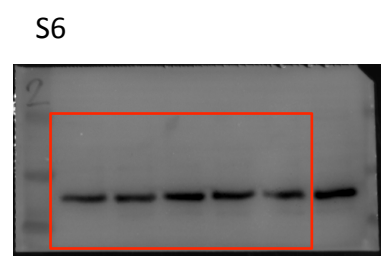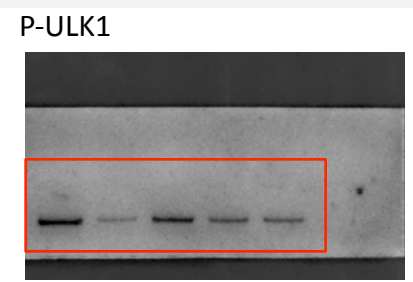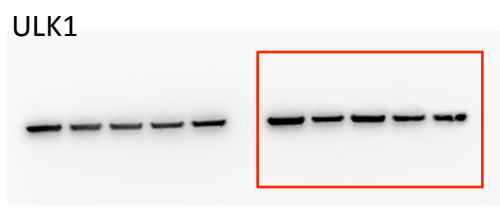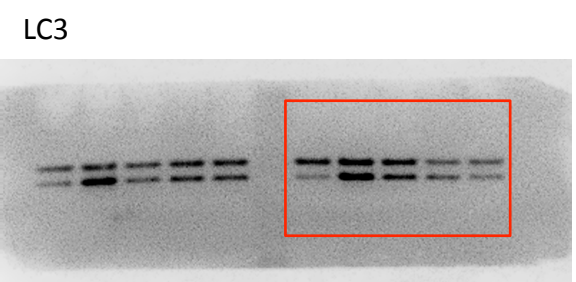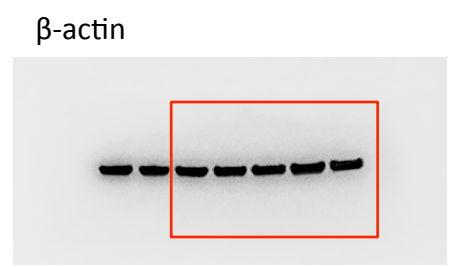

**Figure 5I**

Che-1

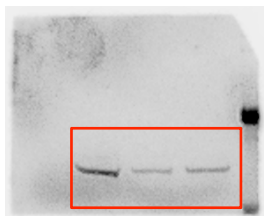

P-S6

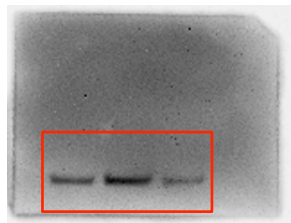

S6

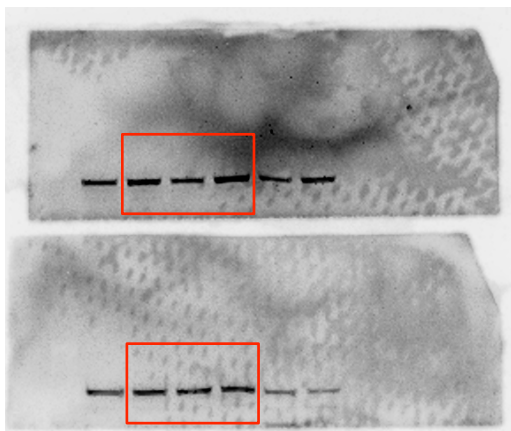

$\beta$ -actin

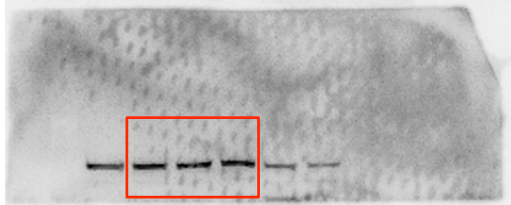

LC3

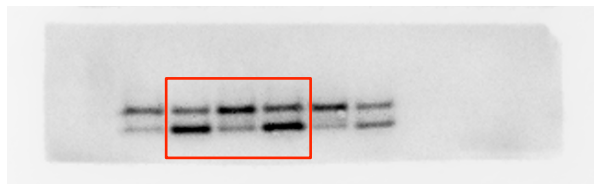

Supplement: embj0034-1214-sd15.pdf [file embj0034-1214-sd15.pdf]
