# Supplementary material
Source: PubMed Central journal article supplement (PMC4426481)

Figure 6D

MGUS

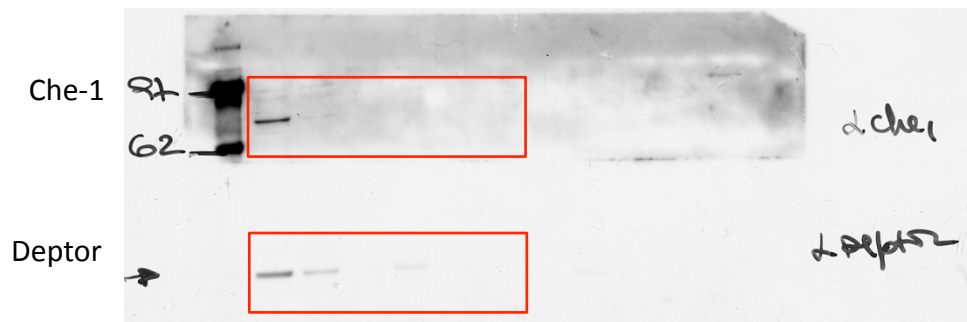

LC3

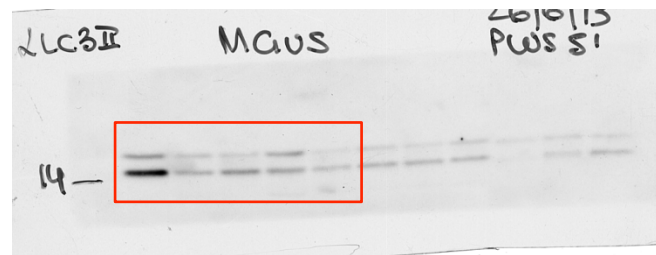

$\beta$ -actin

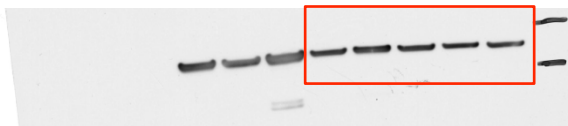

Smoldering Myelomas

Che-1

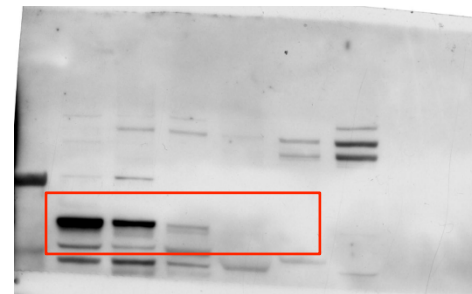

Deptor

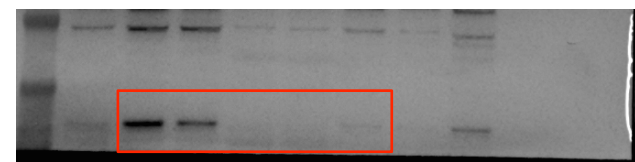

LC3

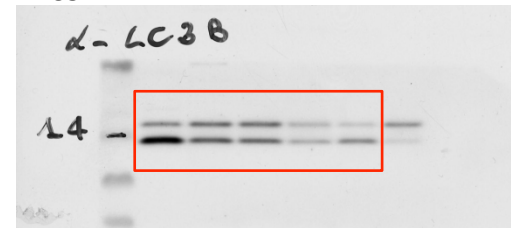

$\beta$ -actin

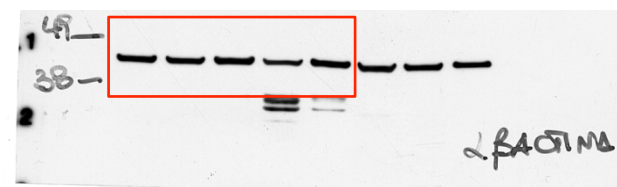

Symptomatic Myelomas

Che-1

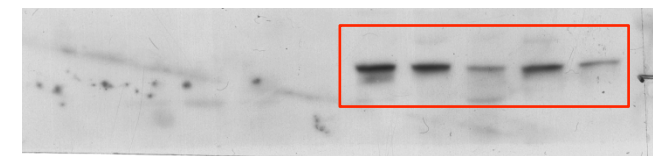

Deptor

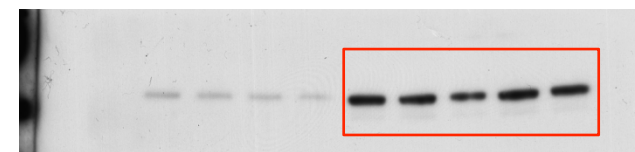

LC3

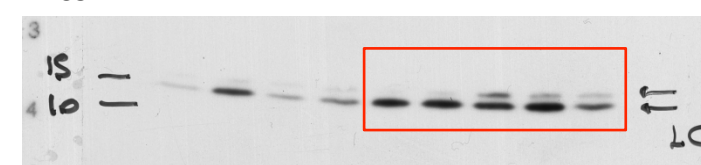

$\beta$ -actin

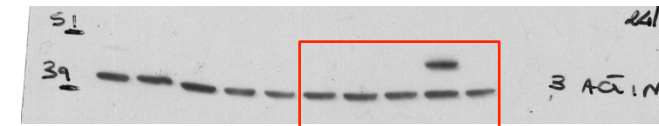

Supplement: embj0034-1214-sd16.pdf [file embj0034-1214-sd16.pdf]
