# Supplementary material
Source: PubMed Central journal article supplement (PMC4426481)

**Figure 1A**

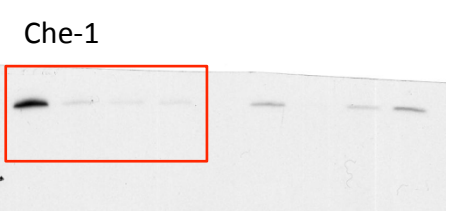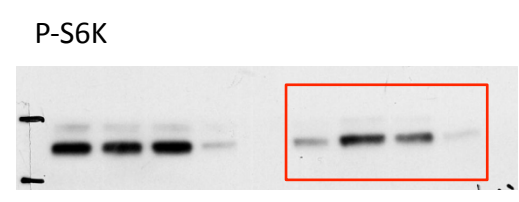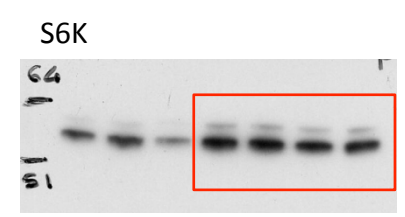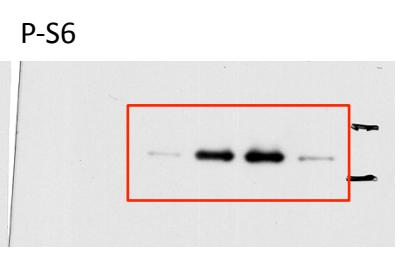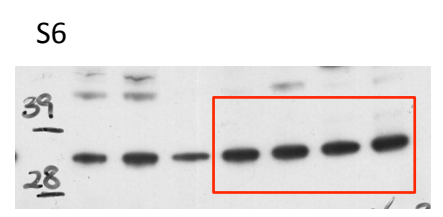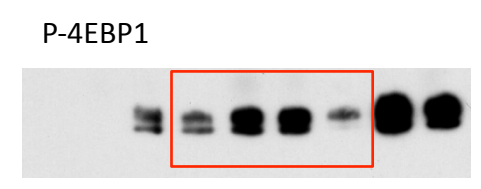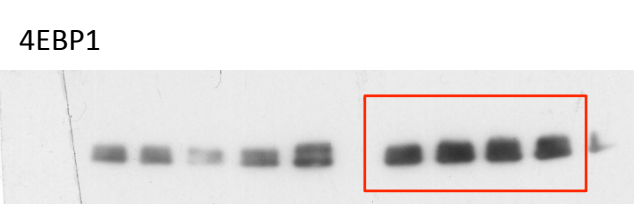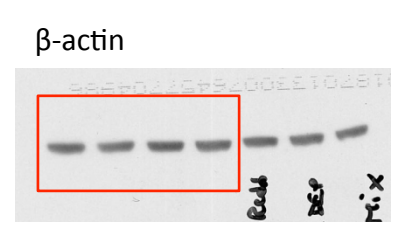

Figure 1B

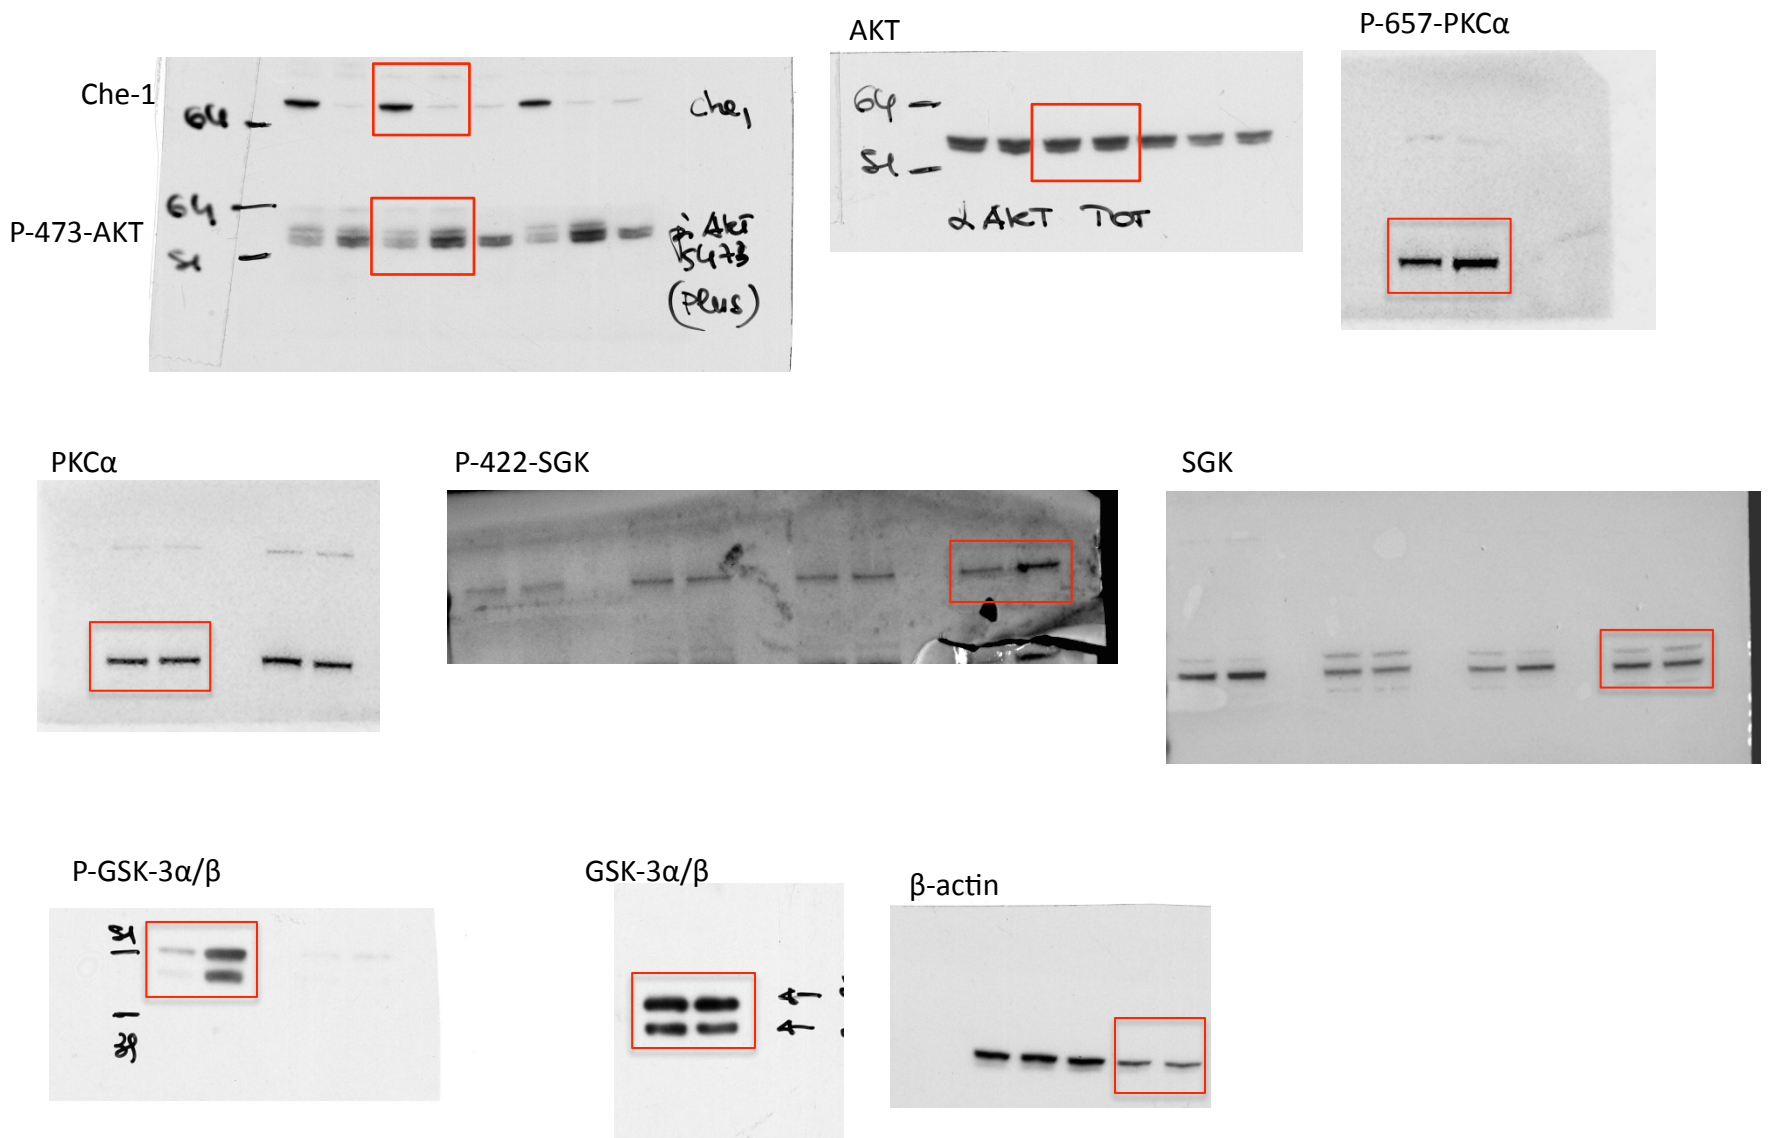

Figure 1D

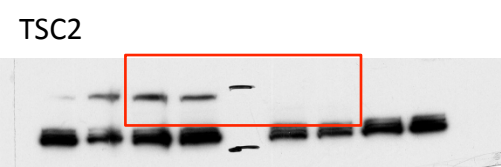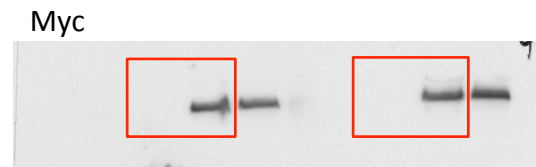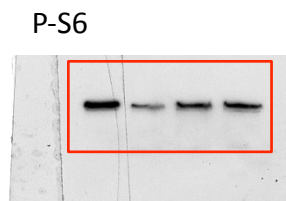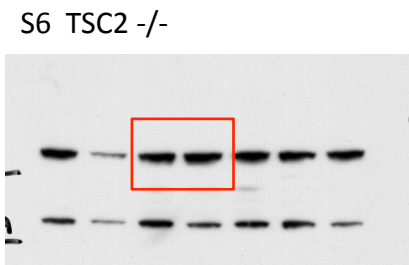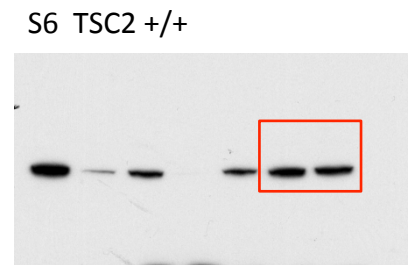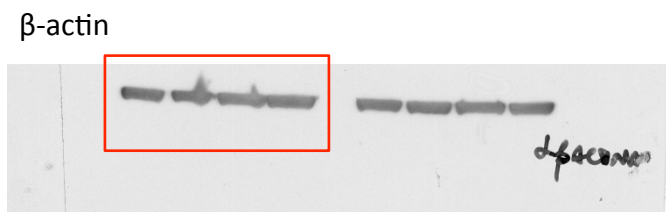

Figure 1E

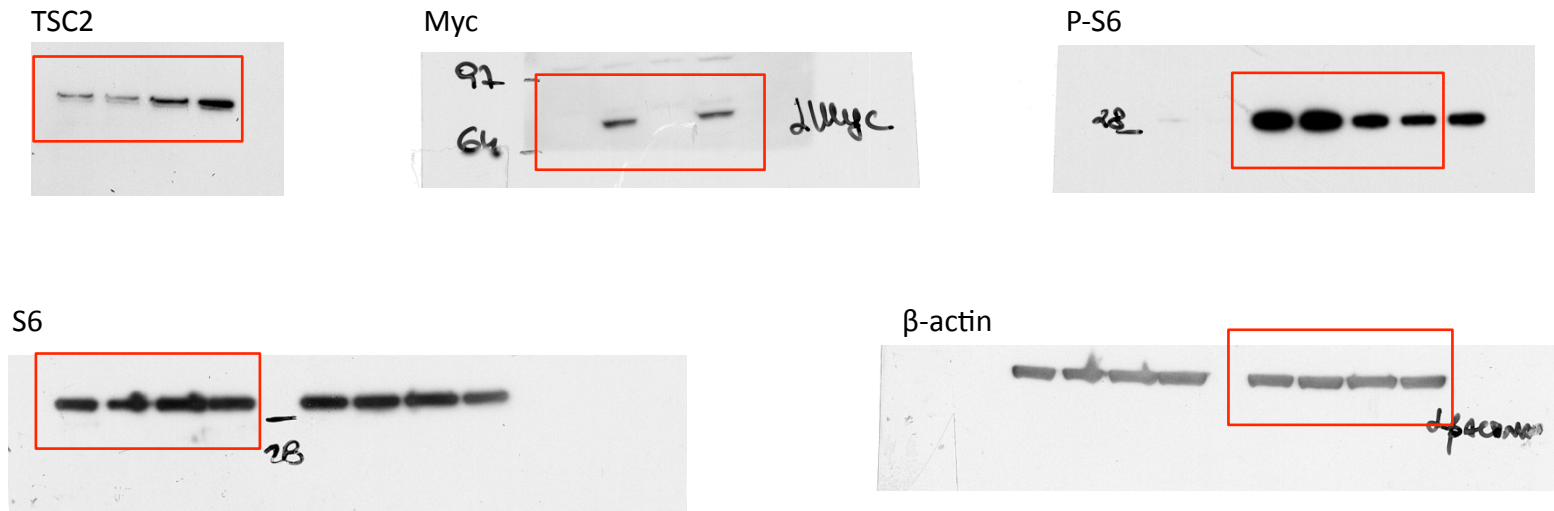

Supplement: embj0034-1214-sd12.pdf [file embj0034-1214-sd12.pdf]

**Figure 2A**

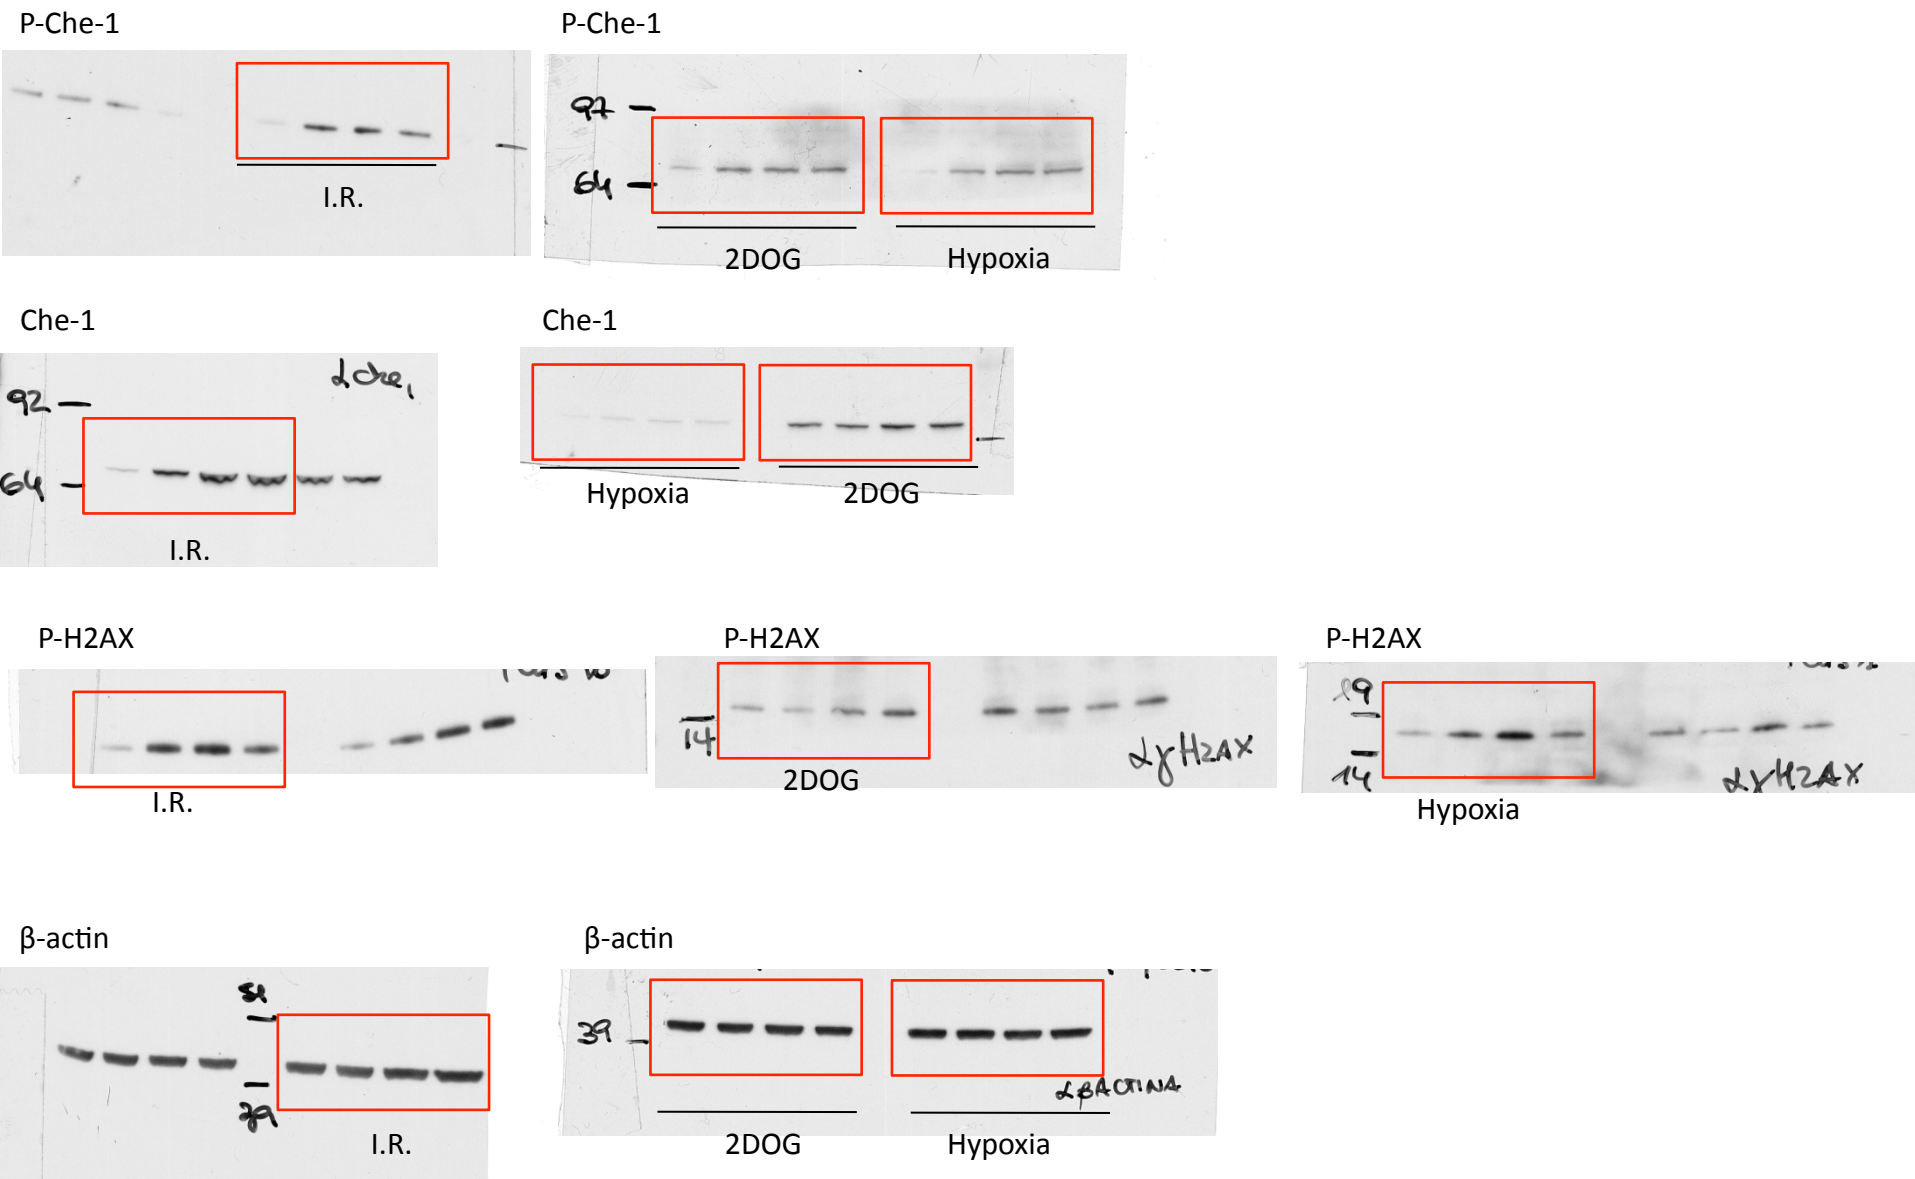

**Figure 2B**

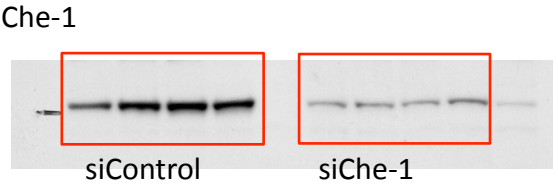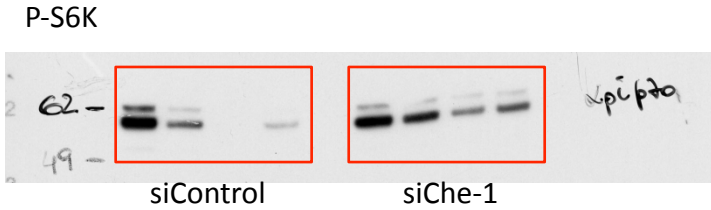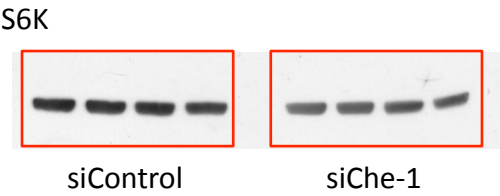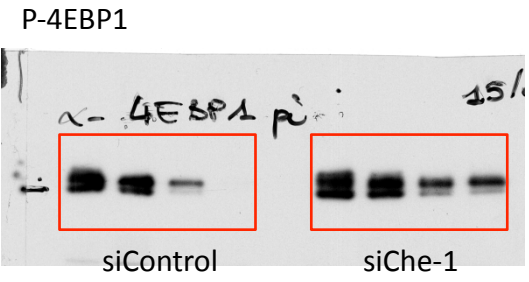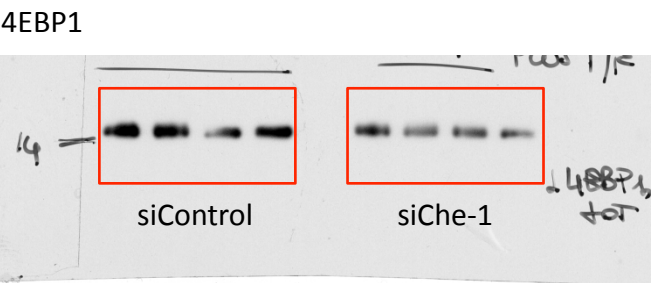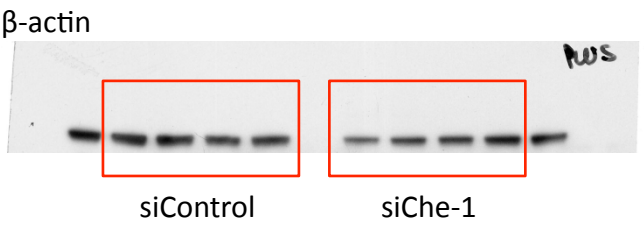

**Figure 2C**

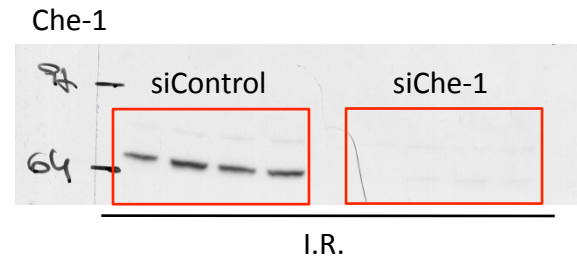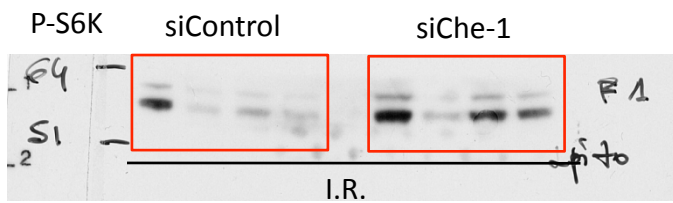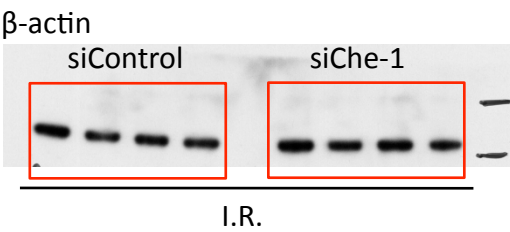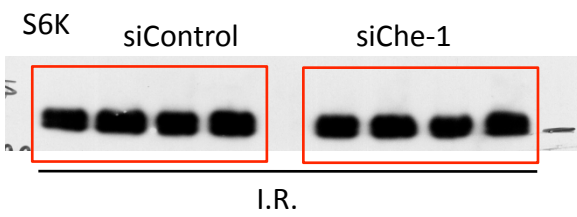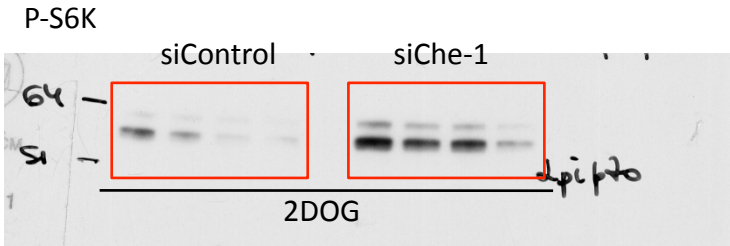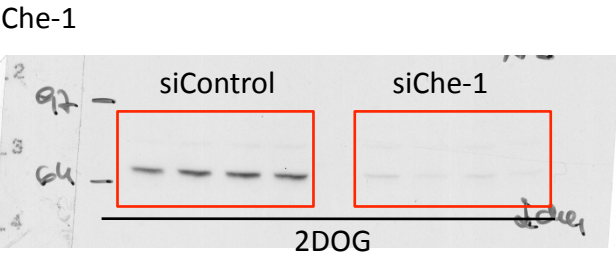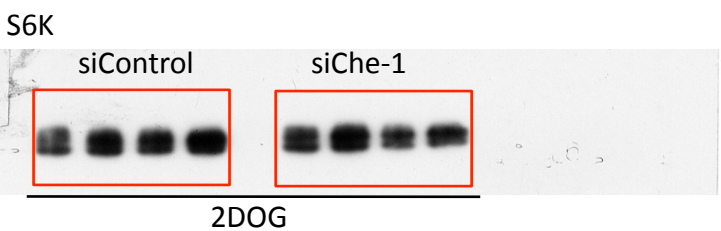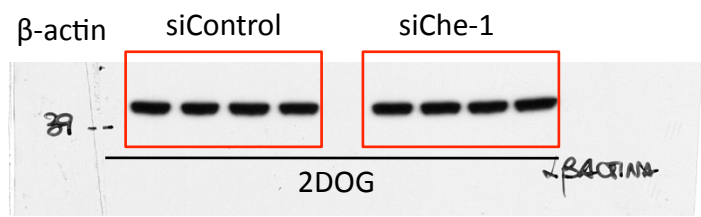

Figure 2D

Che-1

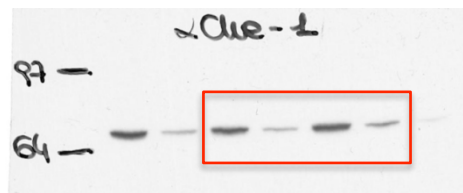

P-S6K

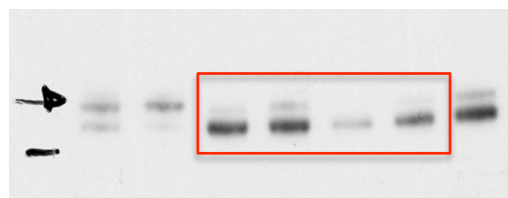

S6K

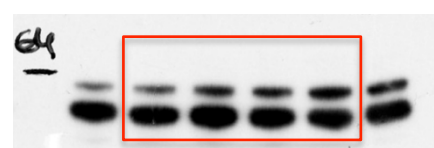

P-S6

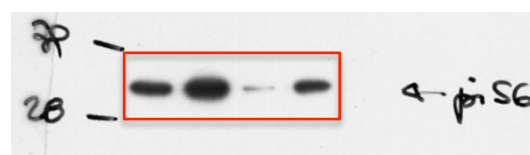

S6

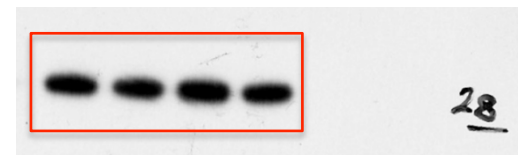

$\beta$ -actin

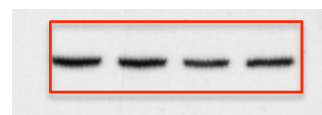

Supplement: embj0034-1214-sd13.pdf [file embj0034-1214-sd13.pdf]

Figure 4A

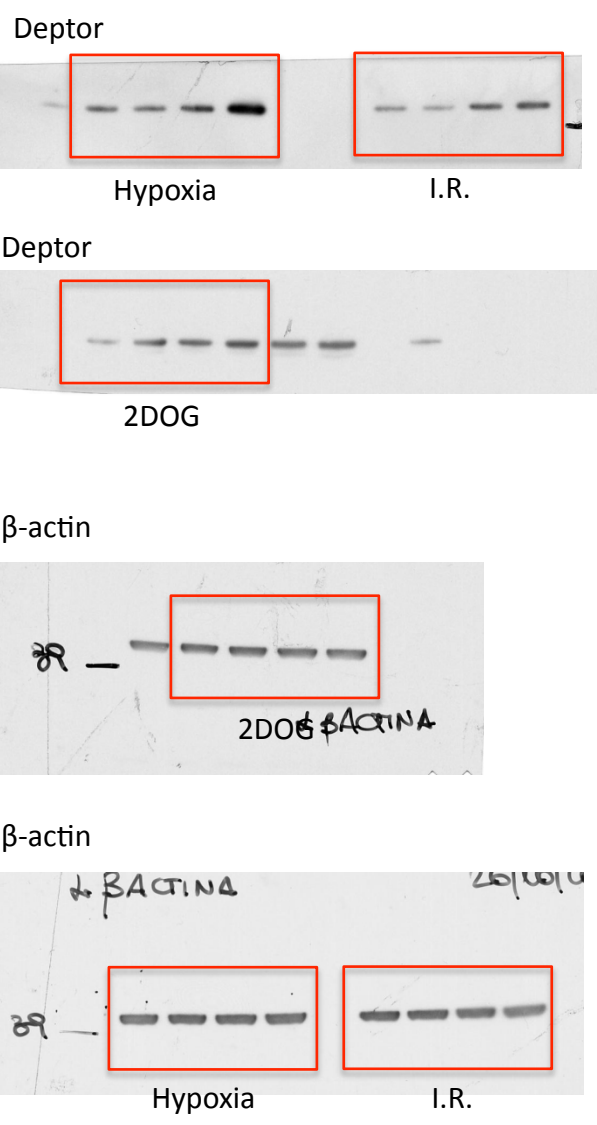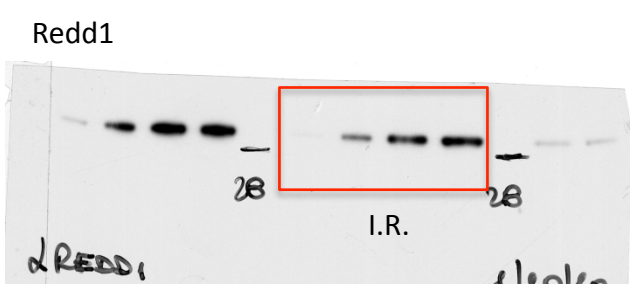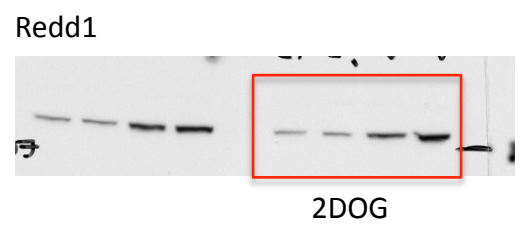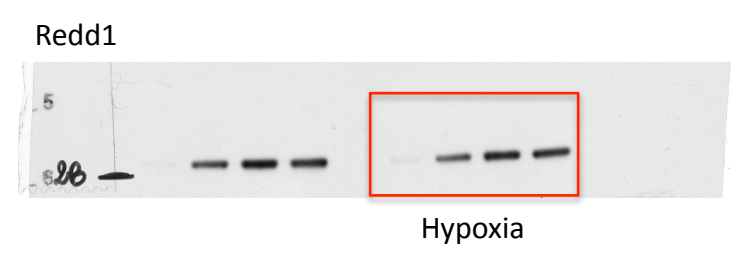

Figure 4C

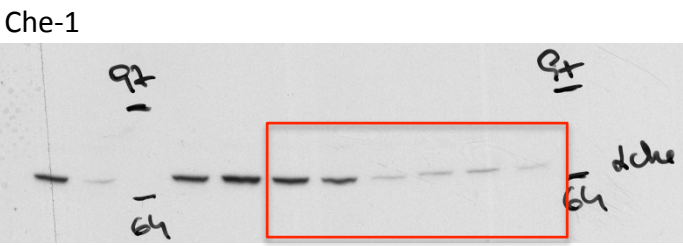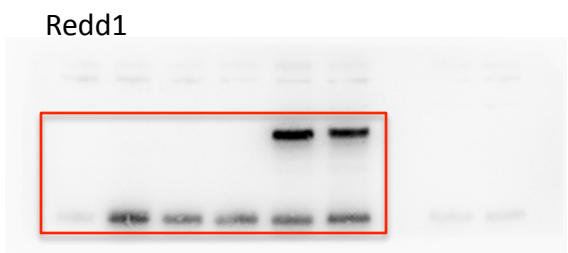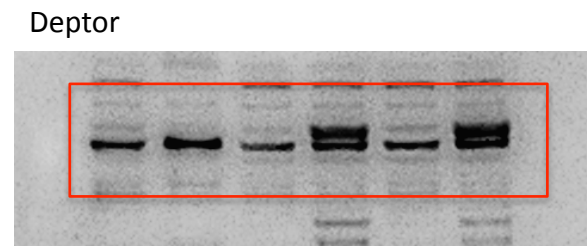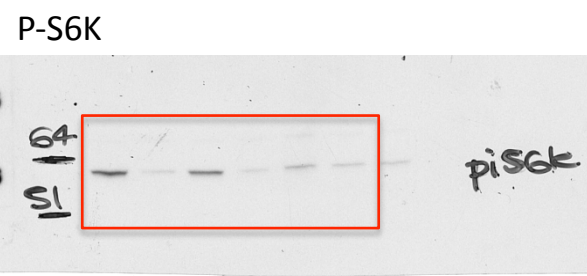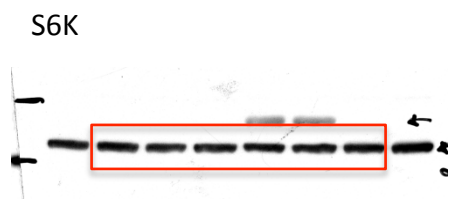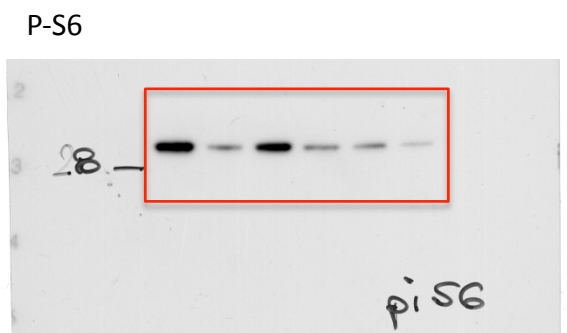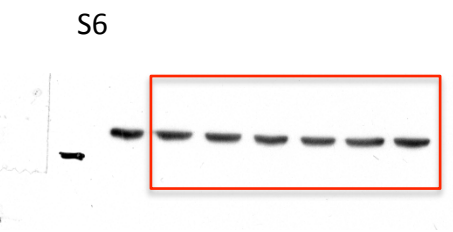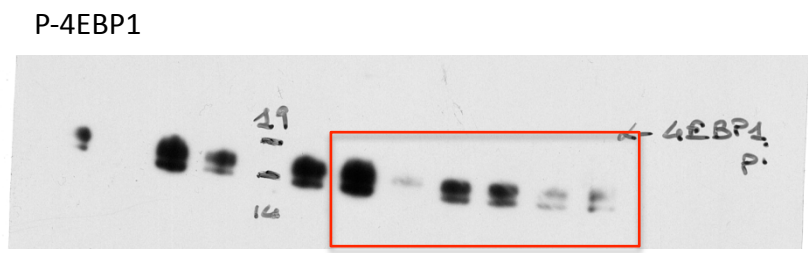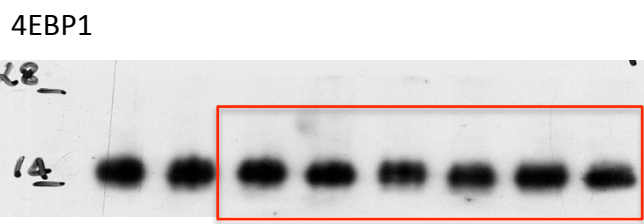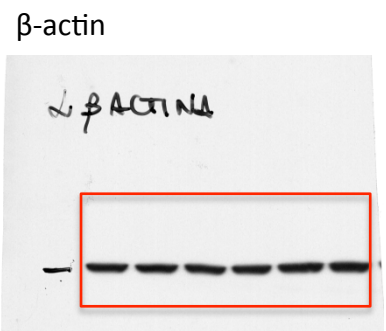

Figure 4E

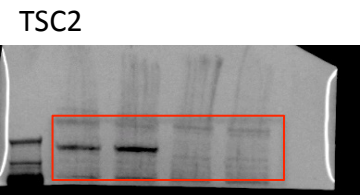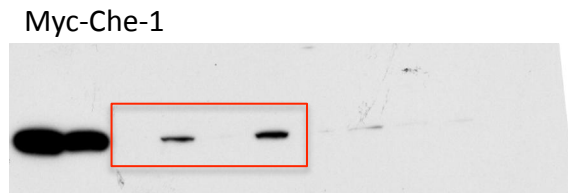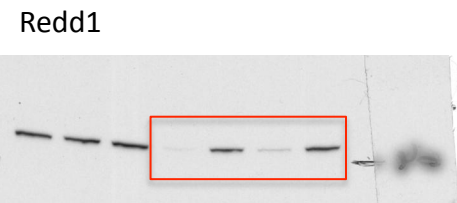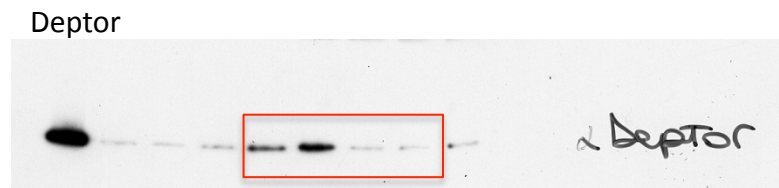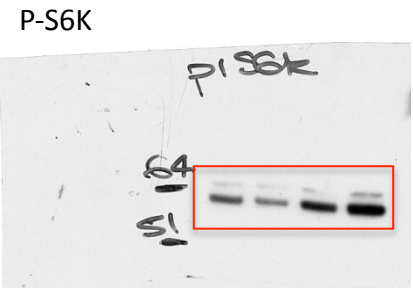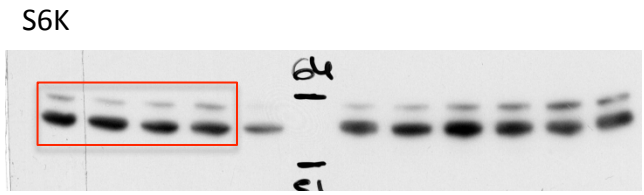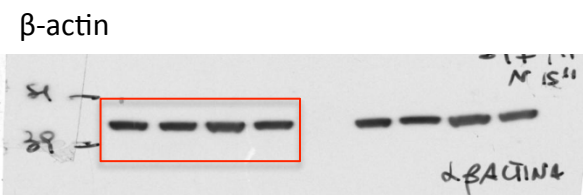

Supplement: embj0034-1214-sd14.pdf [file embj0034-1214-sd14.pdf]

**Figure 7A**

P-Che-1

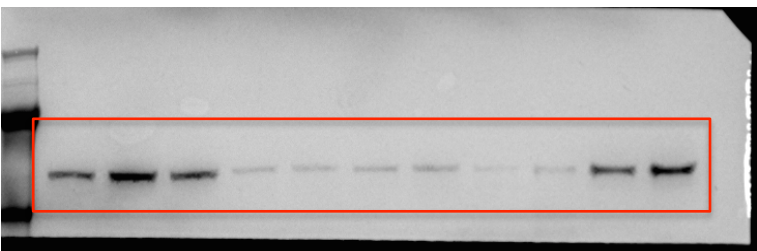

Che-1

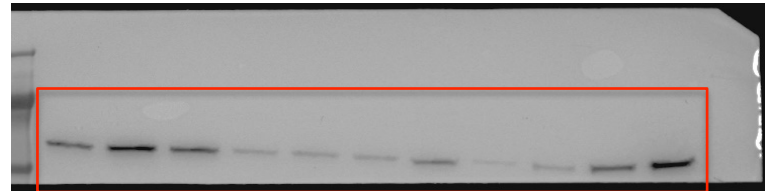

Deptor

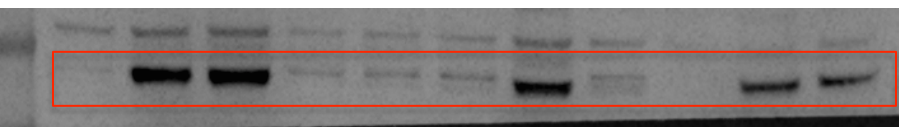

cMaf

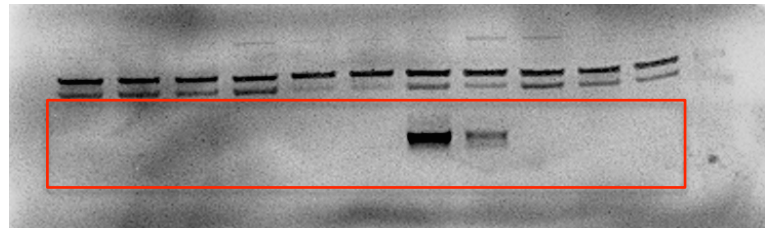

LC3

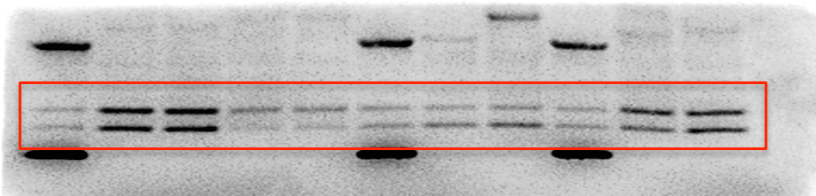

$\beta$ -actin

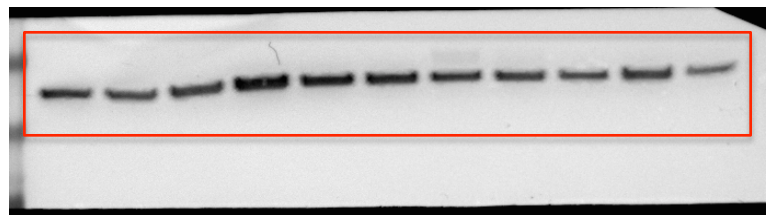

Figure 7B

KMS18 Cells

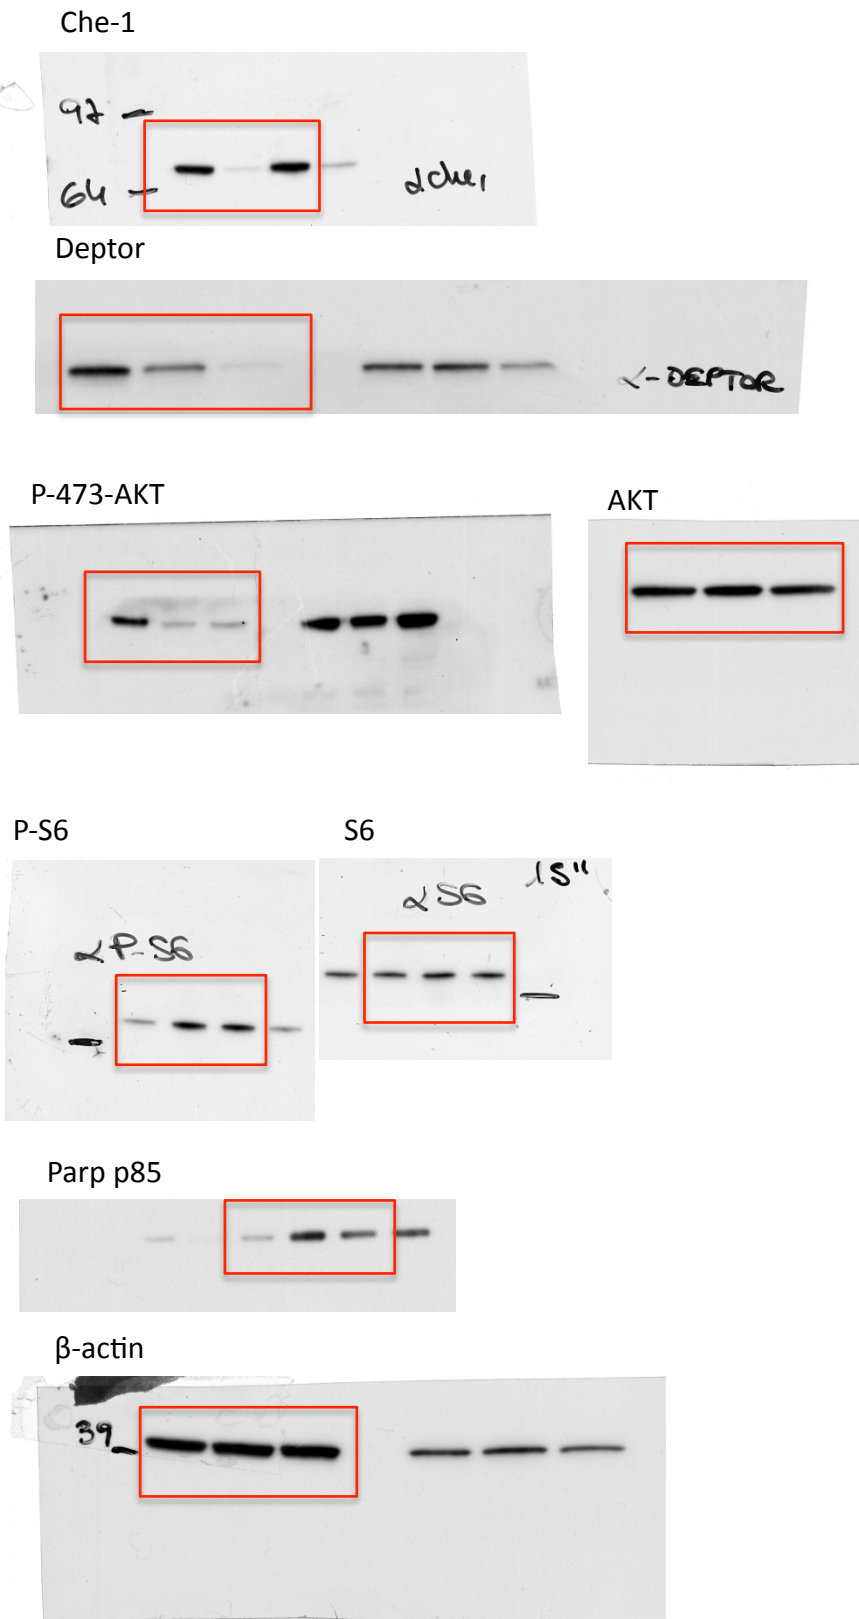

KMS27 Cells

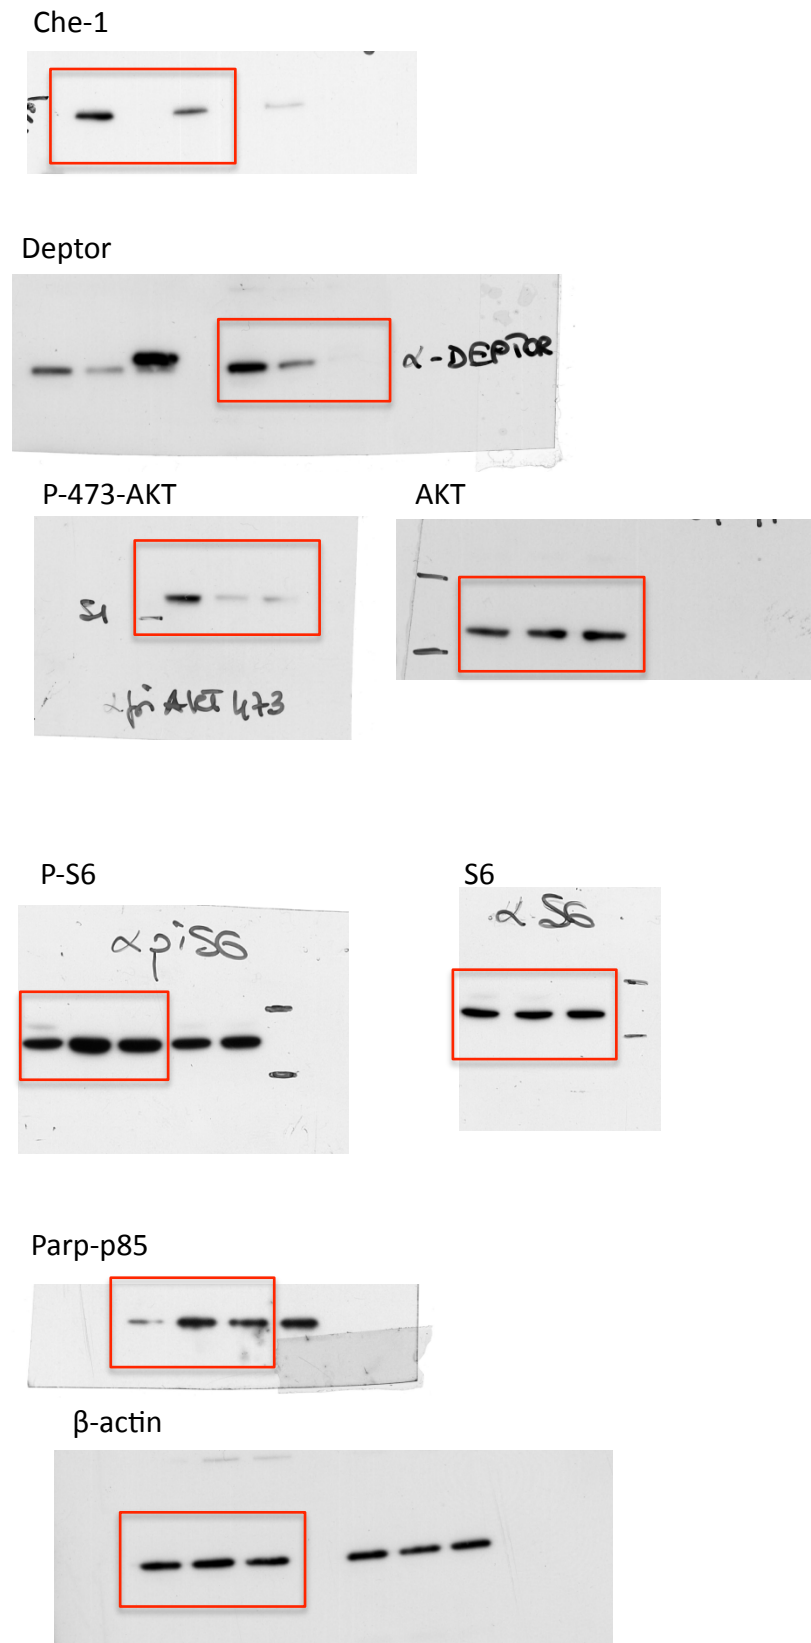

U266 Cells

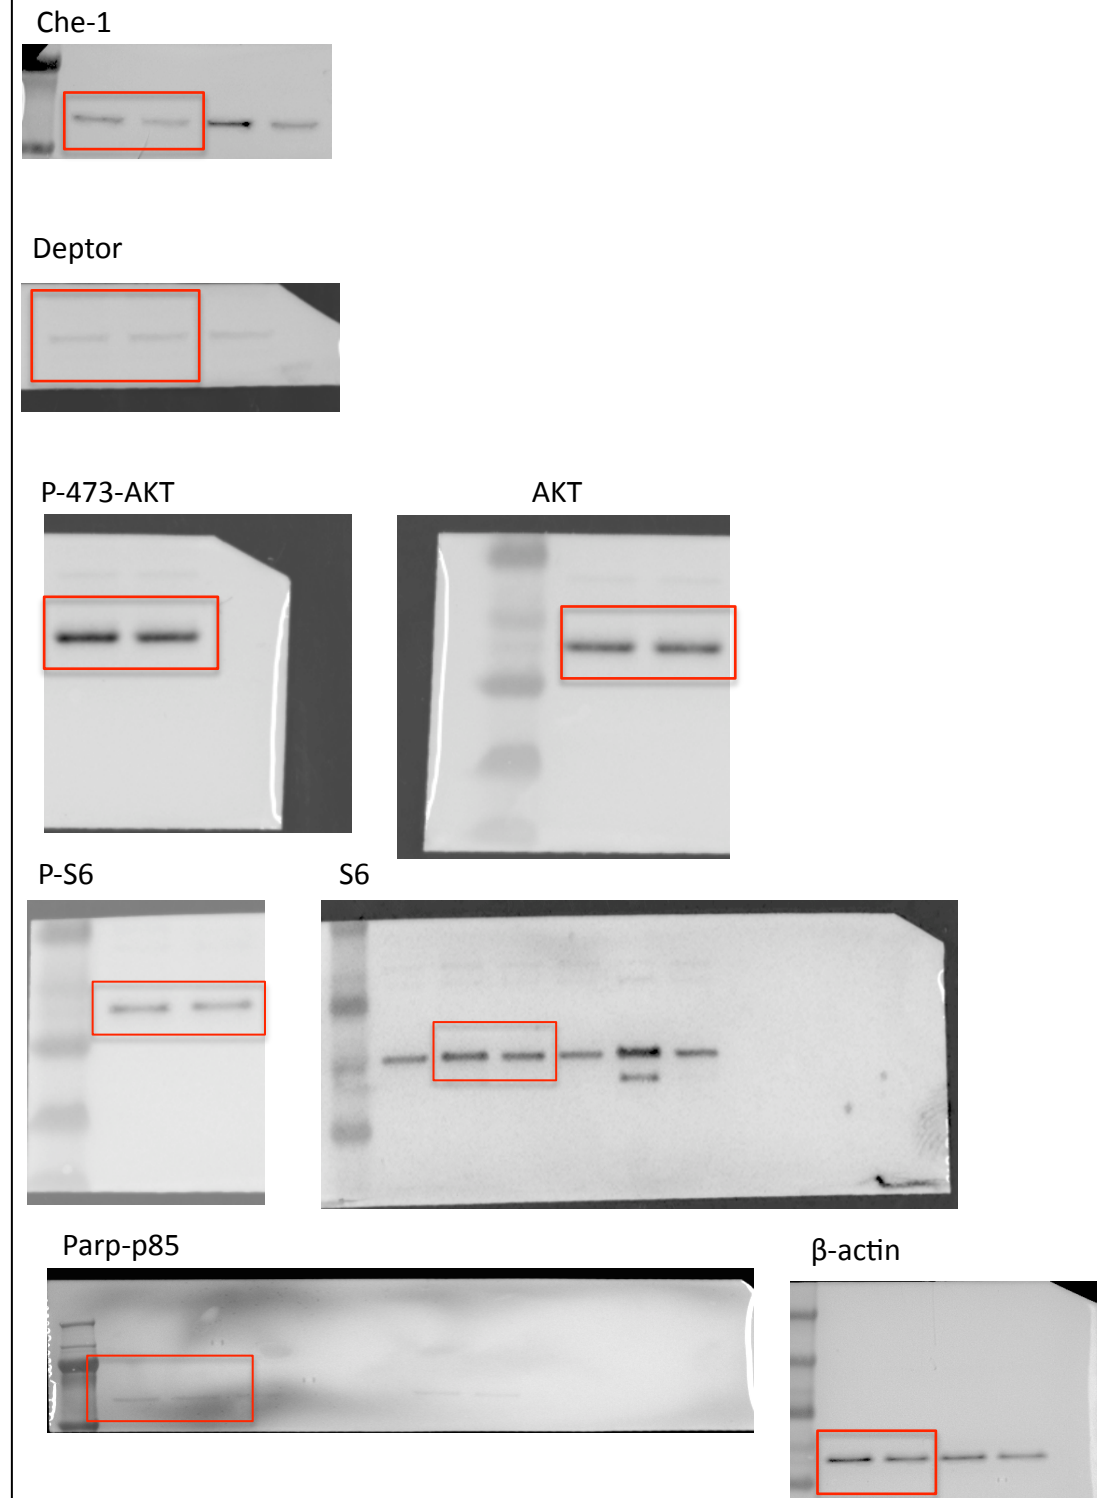



Figure 7E

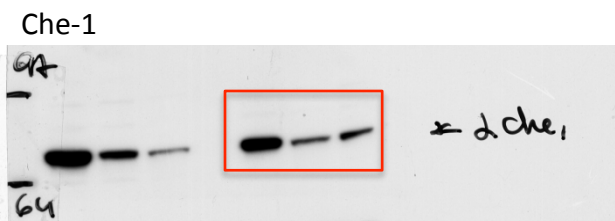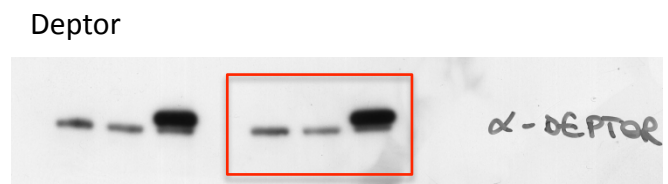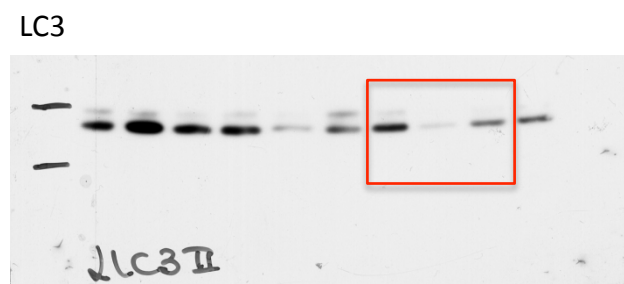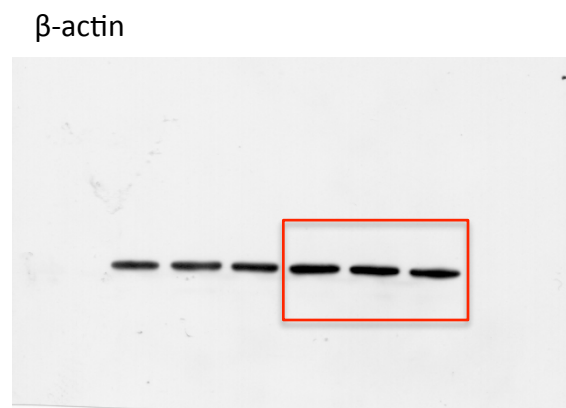

Supplement: embj0034-1214-sd17.pdf [file embj0034-1214-sd17.pdf]

Figure 8A

Che-1

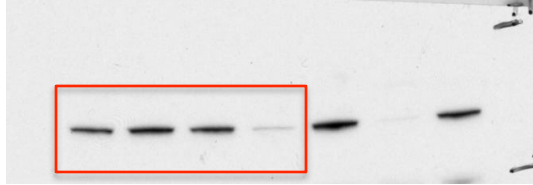

Deptor

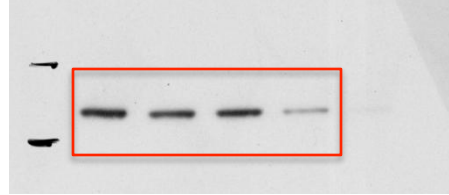

P-S6

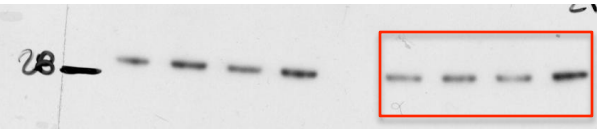

S6

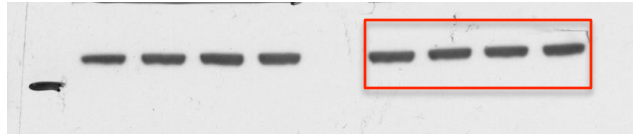

P-473-AKT

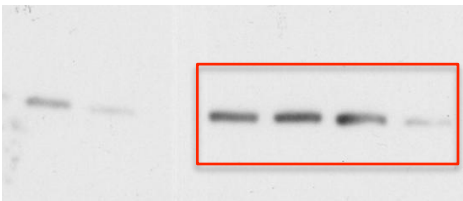

AKT

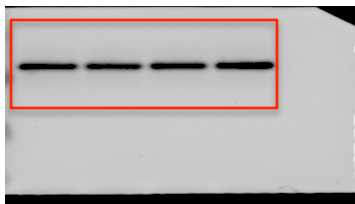

$\beta$ -actin

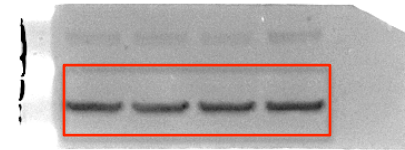

Figure 8D

Che-1

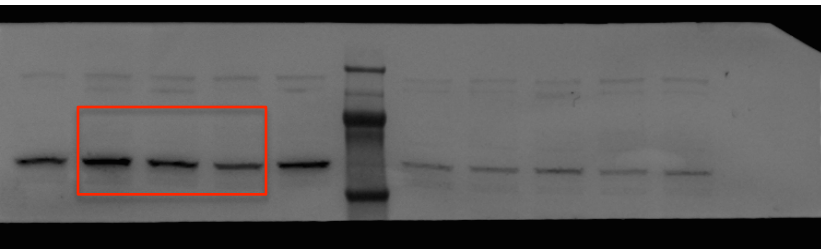

P-S6

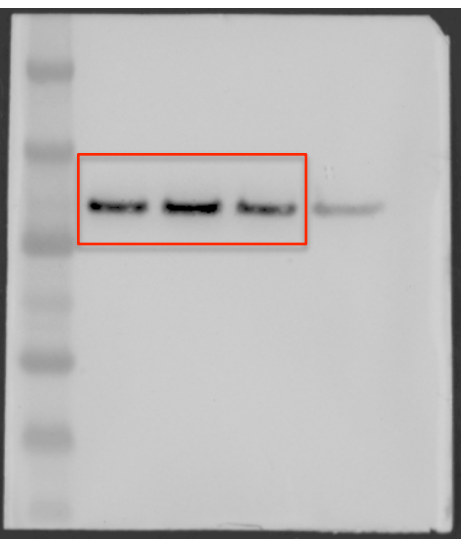

S6

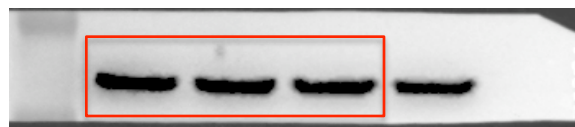

P-473-AKT

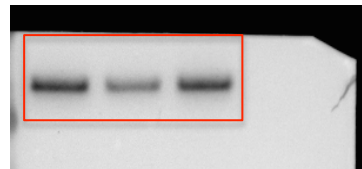

AKT

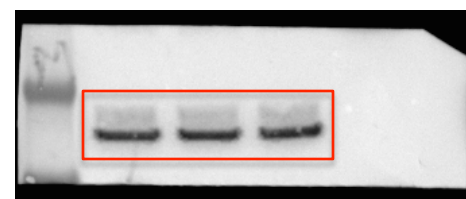

$\beta$ -actin

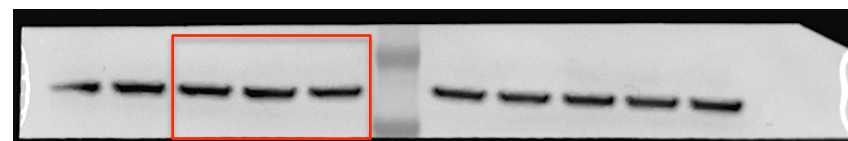

Figure 8E

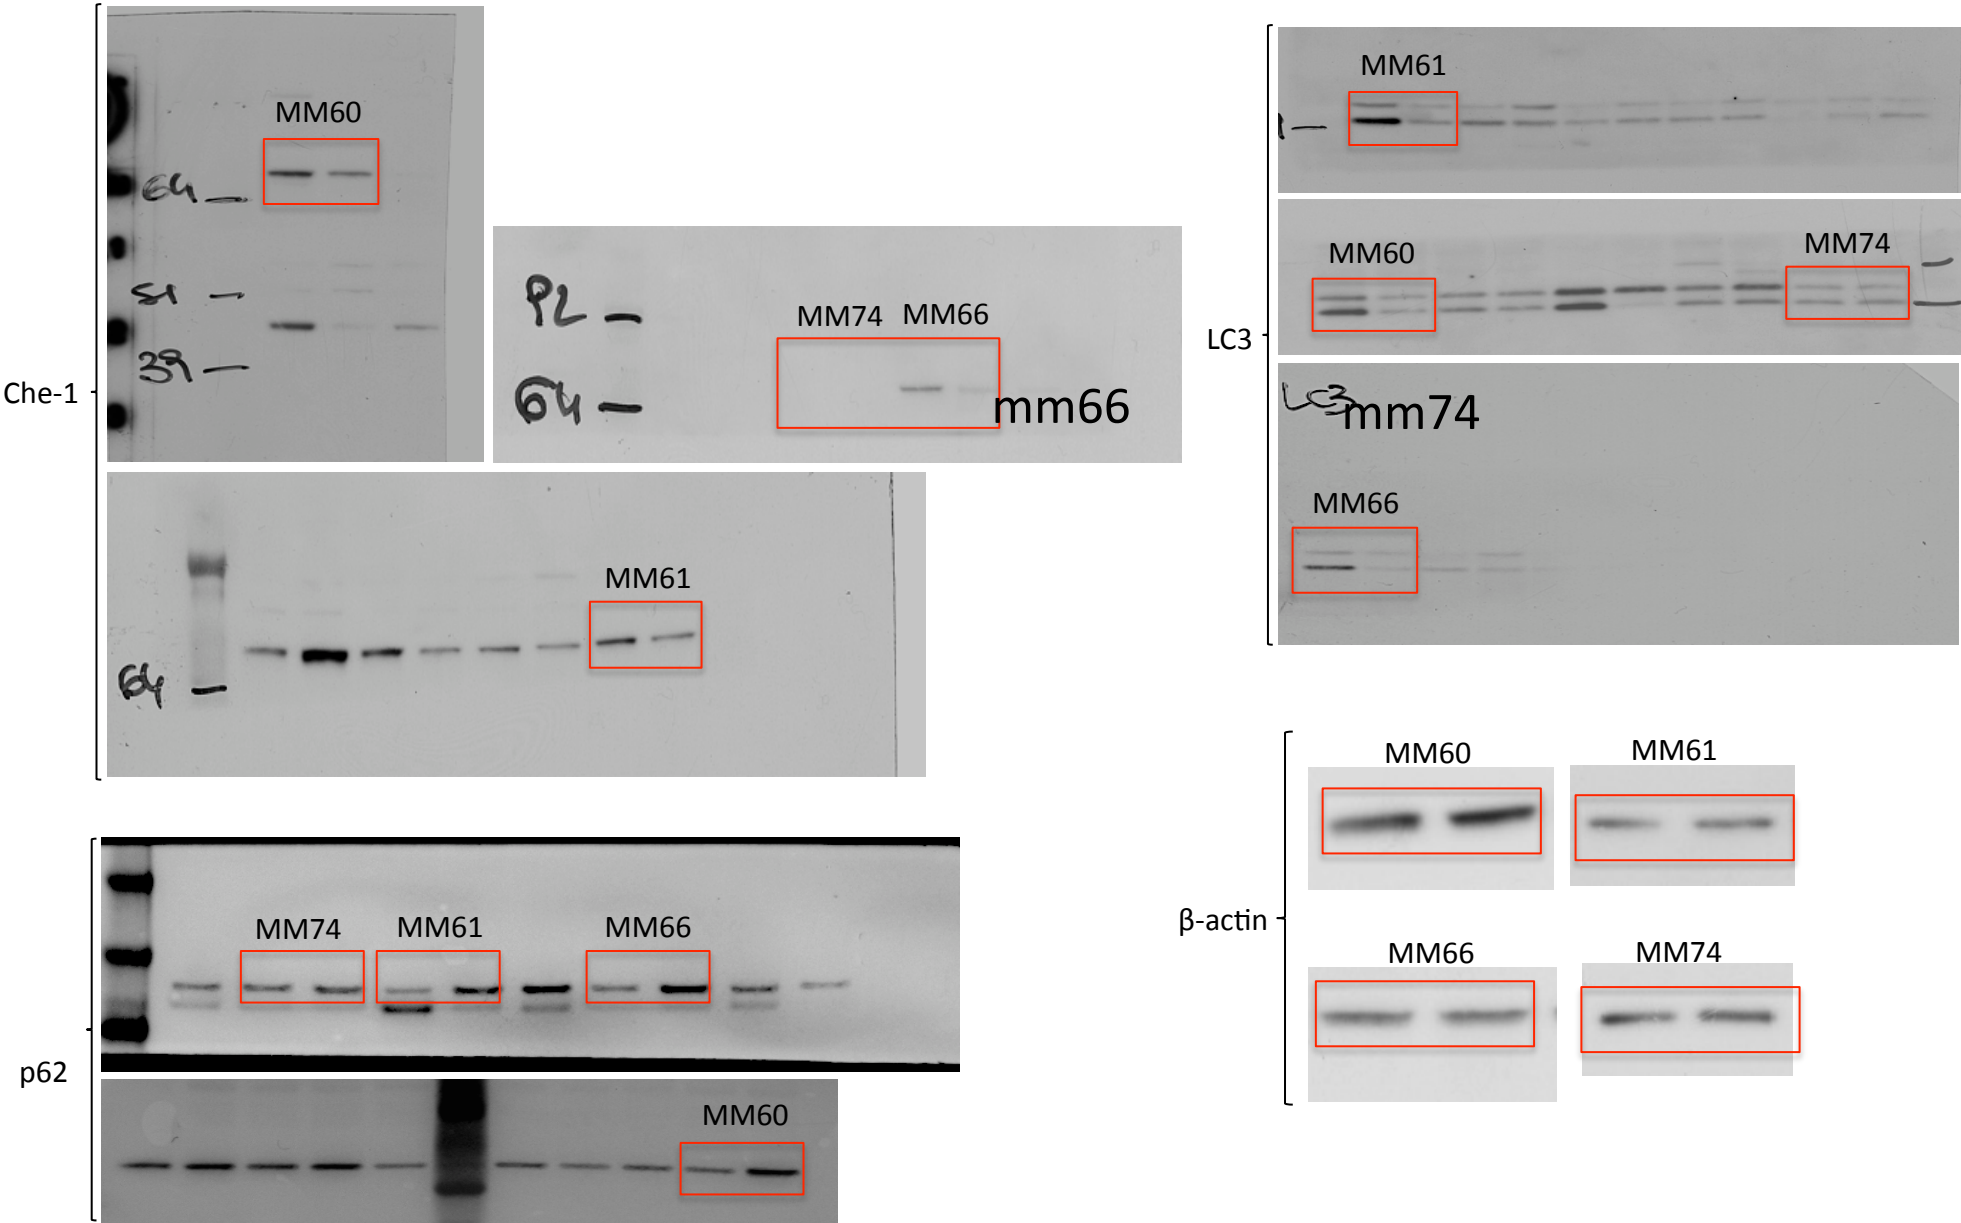

Supplement: embj0034-1214-sd18.pdf [file embj0034-1214-sd18.pdf]
